# Supplementary material for: High-capacitance polyurethane ionogels for low-voltage operated organic transistors and pressure sensors
Source: Royal Society of Chemistry journal article supplement (doi:10.1039/d0tc02364g), 2020-01-01
Supplement: d0tc02364g1.pdf [file d0tc02364g1.pdf]

## Electronic Supplementary Information

### High-Capacitance Polyurethane Ionogel for Low-Voltage Operated Organic Transistors and Pressure Sensors

Grace Dansoa Tabi,<sup>a,†</sup> Joo Sung Kim,<sup>b,†</sup> Benjamin Nketia-Yawson,<sup>a,†</sup> Do Hwan Kim,<sup>\*,b</sup> Young-Yong Noh<sup>\*,c</sup>

<sup>a</sup>Department of Energy and Materials Engineering, Dongguk University, 30 Pildong-ro 1-gil, Jung-gu, Seoul 04620, Republic of Korea

<sup>b</sup>Department of Chemical Engineering, Hanyang University, Seoul 04763, Republic of Korea  
\*E-mail: dhkim76@hanyang.ac.kr; dohwan76.kim@gmail.com

<sup>c</sup>Department of Chemical Engineering, Pohang University of Science and Technology (POSTECH), Pohang 37673, Republic of Korea  
\*E-mail: yynoh@postech.ac.kr

<sup>†</sup>G. D. Tabi, J. S. Kim, and B. Nketia-Yawson contributed equally to this work.

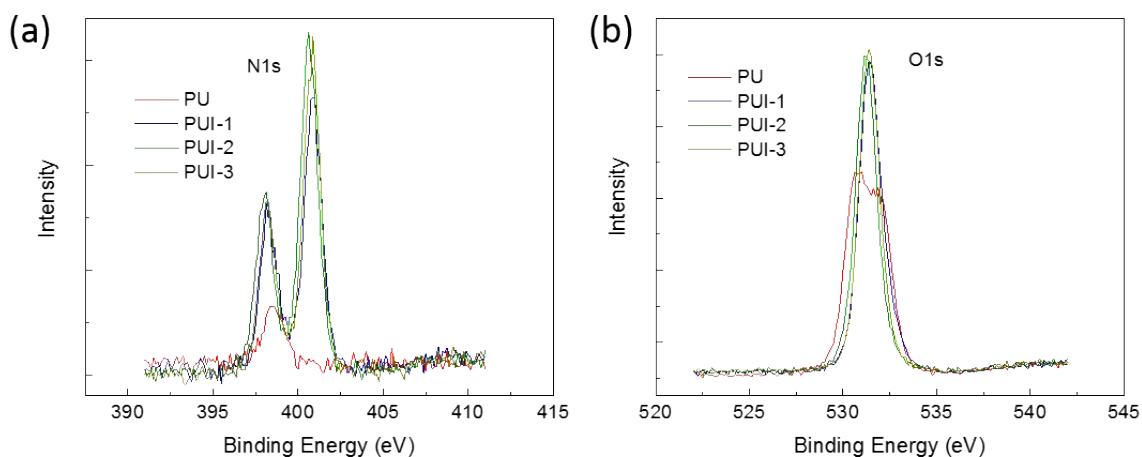

**Fig. S1.** XPS spectra for the core level peaks of (a) N-1s and (b) O-1s in the pristine PU and PU ionogel gate dielectrics.

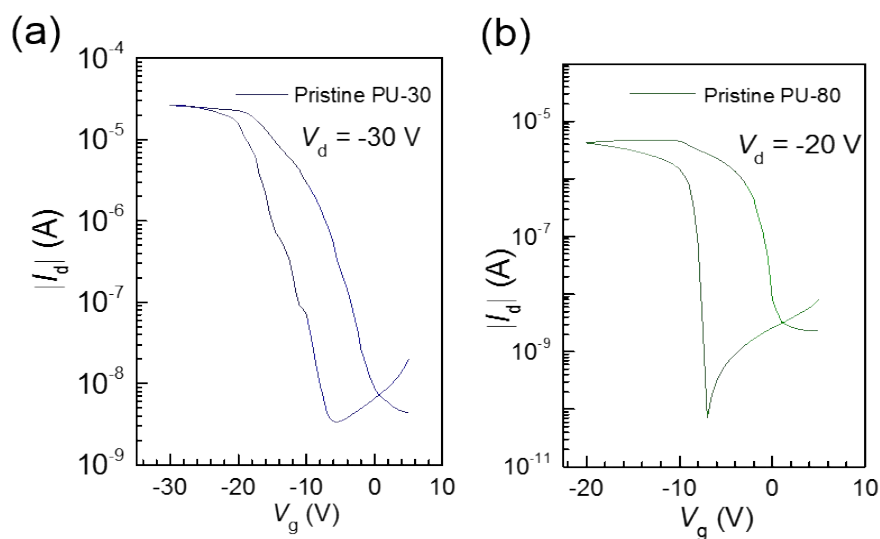

**Fig. S2.** Transfer characteristics of F8T2 organic thin-film transistors (OTFTs) with neat (a) PU-30 and (b) PU-80 gate dielectrics.

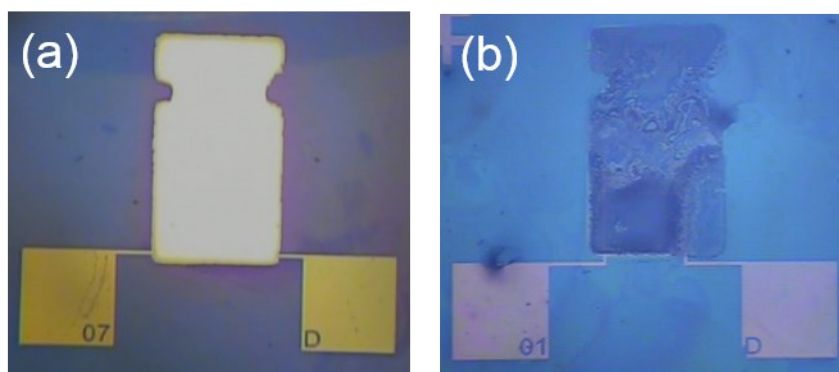

**Fig. S3.** Optical image of the fabricated F8T2 organic thin-film transistors (OTFTs) on glass substrate; (a) PIB-2 and (b) polyurethane-ionogel (PUI) gate dielectrics. No continuous metallic layer can be formed on the PUI.

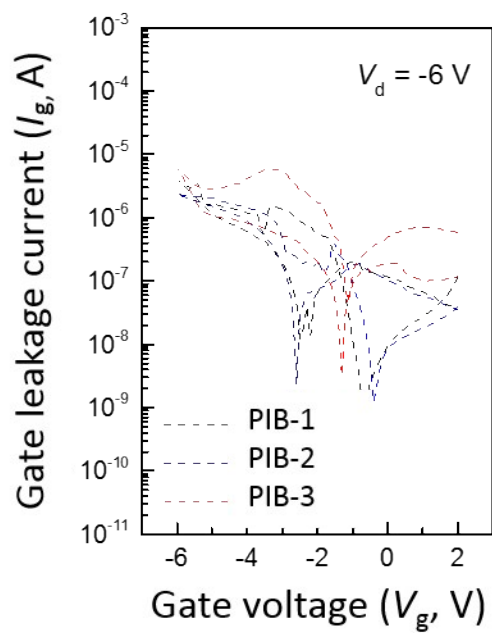

**Fig. S4.** Gate-leakage current levels of F8T2 organic thin-film transistors (OTFTs) with polyurethane ionogel/bilayer (PIB) dielectrics.

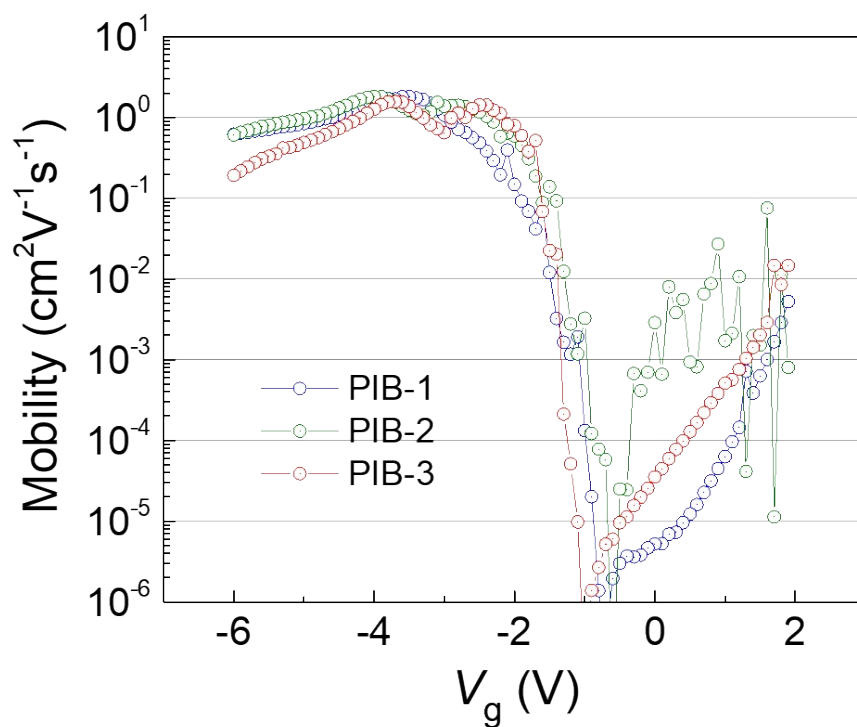

**Fig. S5.** Mobility as function of gate voltage of F8T2 OTFTs with PIB dielectrics.

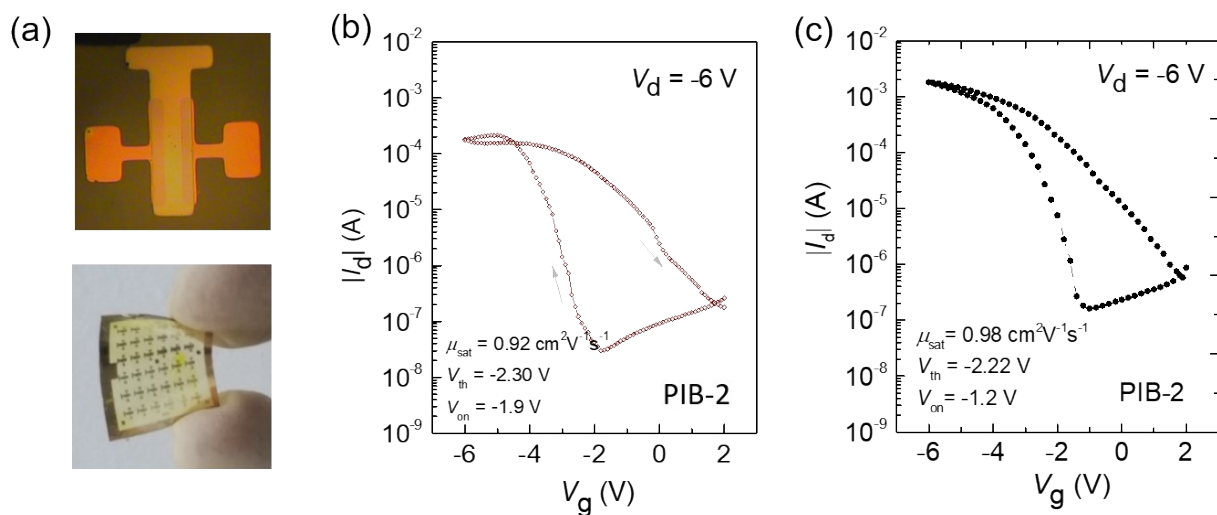

**Fig. S6.** (a) Optical image of the fabricated 150 °C-annealed F8T2/PIB-2 organic thin-film transistors (OTFTs) on polyethylene naphthalate (PEN) substrate with thermally deposited top-gate electrodes and (b) transfer characteristics of 150 °C-annealed F8T2/PIB-2 OTFT on PEN substrate. (c) Transfer characteristics of 150 °C-annealed F8T2/PIB-2 OTFT on glass substrate.
